# Supplementary material
Source: PubMed Central journal article supplement (PMC5240152)
Supplement: NIHMS839587-supplement-Supplemental_Figures.pdf [file NIHMS839587-supplement-Supplemental_Figures.pdf]

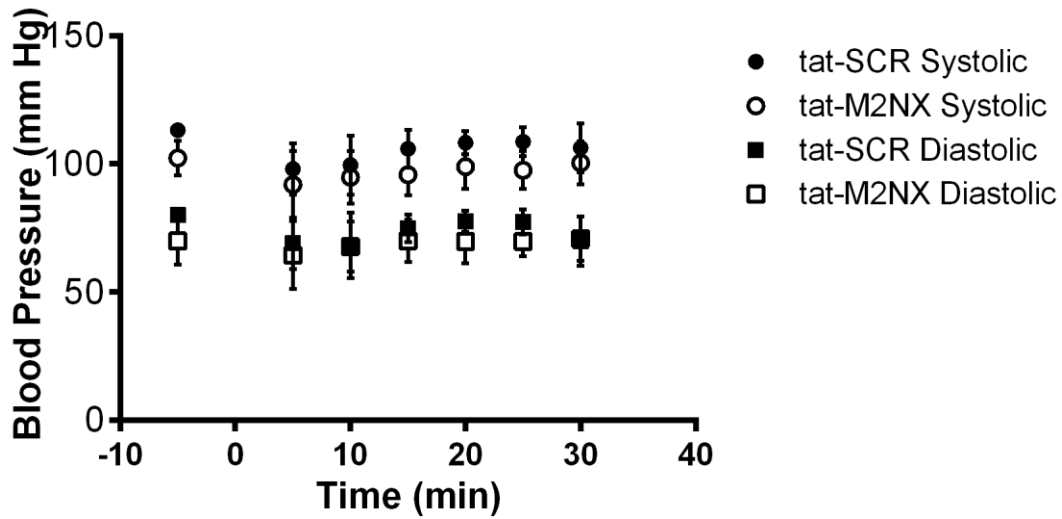

**Supplemental Figure 1.** tat-M2NX has no effect on systolic or diastolic blood pressures up to 30 minutes after receiving drug in control mice compared to tat-SCR. Injection was given at time 0.

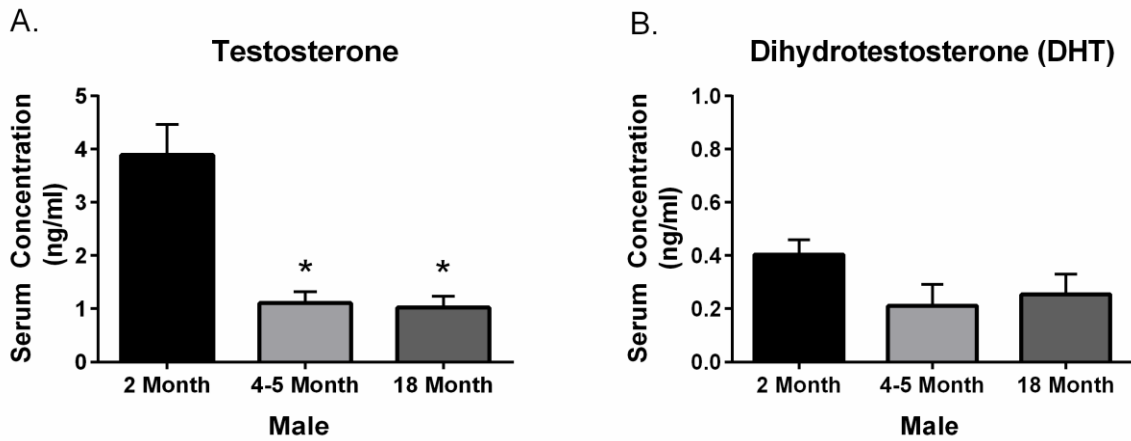

**Supplemental Figure 2.** Testosterone, but not dihydrotestosterone, decreases with age in male mice. (A) Quantification of serum concentration of testosterone measured by ELISA in male mice aged 2 months, 4-5 months, and 18 months. (B) Quantification of serum concentration of dihydrotestosterone (DHT) measured by ELISA in male mice aged 2 months, 4-5 months, and 18 months. \* $p < 0.05$ .
